# Supplementary material for: How does aggregation of doxorubicin molecules affect its solvation and membrane penetration?
Source: Royal Society of Chemistry journal article supplement (doi:10.1039/d2nj06221f), 2023-01-01
Supplement: d2nj06221f1.pdf [file d2nj06221f1.pdf]

## Electronic Supporting Information (ESI)

for

### How Does Aggregation of Doxorubicin Molecules Affect Its Solvation and Membrane Penetration?

Sadaf Shirazi-Fard,<sup>a</sup> Amin Reza Zolghadr<sup>\*a</sup>, Axel Klein<sup>\*a,b</sup>

<sup>a</sup> Department of Chemistry, Shiraz University, Shiraz, 71946-84795, Iran

<sup>b</sup> University of Cologne, Faculty of Mathematics and Natural Sciences, Department of Chemistry, Greinstrasse 6, D-50939 Cologne, Germany

\*E-mail: arzolghadr@shirazu.ac.ir; Tel.: +98 71 3613 7157; ORCID: 0000-0002-6289-3794

\*E-mail: axel.klein@uni-koeln.de; Tel.: +49-221-470-4006; ORCID: 0000-0003-0093-9619

ORCID: 0000-0002-3276-7906 (SSF)

#### Contents:

#### Supporting Figures

**Fig. S1** DFT-calculated optimised structures of (A) water, (B) EtOH, (C) DMSO, (D) DMF, (E) DPPC, and (F) octanol.

**Fig. S2** Radial distribution functions (*RDFs*) of DOX<sup>-</sup>-water interactions using calculated charges, (A) from the NBO method, and (B) from the CHELPG method.

**Fig. S3** Calculated radial distribution functions (*RDFs*) of DOX in (A) water, (B) EtOH, (C) DMSO, (D) DMF, (E) at the water/DPPC interface, and (F) at the water/octanol interface at different simulation times.

**Fig. S4** (A) Total energy, (B) Density, (C) RMSD of the DOX/water, DOX/EtOH, DOX/DMSO and DOX/DMF systems, and (D) RMSD of DOX/DMF, showing the equilibration of the systems during the simulation time.

**Fig. S5** Most probable *RDFs* between selected DOX H atoms and DOX O or N atoms in different solvents.

**Fig. S6** Combined distribution functions (*CDFs*) of the angular distribution functions (*ADFs*) (x-axis) and radial distribution functions (*RDFs*) (y-axis) for the hydrogen bonds of DOX molecules in EtOH.

**Fig. S7** *CDFs* of the *ADFs* (x-axis) and *RDFs* (y-axis) for the hydrogen bonds of DOX molecules in DMSO.

**Fig. S8** *CDFs* of the *ADFs* (x-axis) and *RDFs* (y-axis) for the hydrogen bonds of DOX molecules in DMF.

**Fig. S9** Number of hydrogen bonds in DOX<sup>-</sup>-DOX interactions in different solvents.

**Fig. S10** DOX<sup>-</sup>-DOX *RDFs* between DOX C atoms in different solvents.

**Fig. S11** Representative simulation snapshots of DOX in different solvents after 30 ns.

**Fig. S12** Average cluster sizes of DOX in different solvents.

**Fig. S13** Average HB Existence autocorrelation functions (*ACFs*) of DOX in (A) water, (B) EtOH, (C) DMSO, and (D) DMF.

**Fig. S14** *RDFs* of (A) neutral DOX atoms with water, (B) selected neutral DOX H atoms and DOX O or N atoms, (C) protonated DOX (DOXH<sup>+</sup>) atoms with water, and (D) selected protonated DOX (DOXH<sup>+</sup>) atoms and DOX O or N atoms using Amber force field.

**Fig. S15** (A) Mean-square displacement (*MSD*) of the geometrical centre, (B) Number of hydrogen bonds in DOX<sup>-</sup>-DOX interactions, and (C) Average cluster sizes of neutral DOX (DOX) and protonated DOX (DOXH<sup>+</sup>) in water using Amber force field.

**Fig. S16** (A) Total energy, (B) Density, and (C) *RMSDs* of DOX/water system for neutral DOX (DOX) and protonated DOX (DOXH<sup>+</sup>) using the Amber force field, indicating the system's equilibration during the simulation time.

**Fig. S17** Representative simulation snapshots of DOX at octanol/water interfaces at different simulation times.

**Fig. S18** *RDFs* of (A) DOX H atoms with O<sub>9</sub> of DPPC, and (B) DOX H atoms with the water O atom in the system of DOX/water/DPPC after 300 ns.

**Fig. S19** Representative simulation snapshots of DOX at DPPC/water interfaces (A) with 128, and (B) with 256 lipid molecules after 300 ns. The DOX atoms are shown as green (C), red (O), and blue (N) balls. The hydrocarbon chains of octanol are shown in grey, while the hydroxy groups are depicted in red. The water phase is in cyan.

**Fig. S20** Total density profiles of the (A) octanol/DOX/water, and (B) DPPC/DOX/water systems.

**Fig. S21** Atomic density profile of the (A) octanol/DOX/water, and (B) DPPC/DOX/water systems.

**Fig. S22** DOX-DPPC *RDFs* of DOX H atoms with (A) O<sub>9</sub>, and (B) O<sub>10</sub> of DPPC.

**Fig. S23** DOX-water *RDFs* in the DPPC/DOX/water system. (A) DOX O atoms with water H atoms, and (B) DOX H atoms with water O atoms.

**Fig. S24** DOX-octanol *RDFs* in the octanol/DOX/water system. (A) DOX O atoms with octanol H atoms, and (B) DOX H atoms with the octanol O atom.

**Fig. S25** DOX-water *RDFs* in the octanol/DOX/water system. (A) DOX O atoms with water H atoms, and (B) DOX H atoms with the water O atom.

**Fig. S26 (A)** Total energy (B) *RMSDs* of the DOX/octanol/water and DOX/DPPC/water systems, showing the equilibration of the systems during the simulation time.

**Fig. S27** Average deuterium order parameters obtained for the sn-1 and sn-2 chains of DPPC.

## Supporting Tables

**Table S1** DFT-calculated partial atomic charges of DOX using the NBO method.

**Table S2** DFT-calculated partial atomic charges of EtOH.

**Table S3** DFT-calculated partial atomic charges of DMSO.

**Table S4** DFT-calculated partial atomic charges of DMF.

**Table S5** DFT-calculated partial atomic charges of octanol.

**Table S6** DFT-calculated partial atomic charges of DOX using the CHELPG method.

**Table S7** DFT-calculated partial atomic charges of DOXH<sup>+</sup> using the RESP method.

**Table S8** DFT-calculated partial atomic charges of DOX using the RESP method.

**Table S9** DFT-calculated partial atomic charges of DOX in the gas phase and different solvents.

**Table S10** MD-calculated first peak position of *RDFs* between DOX and solvent atoms.

**Table S11** Average of hydrogen bond lifetimes ( $\tau(HB)$ ) between DOX and solvent atoms.

**Table S12** Calculated first peaks of *RDFs* between different pairs of atoms in DPPC/DOX/water and octanol/DOX/water systems.

## References

## Supporting Figures

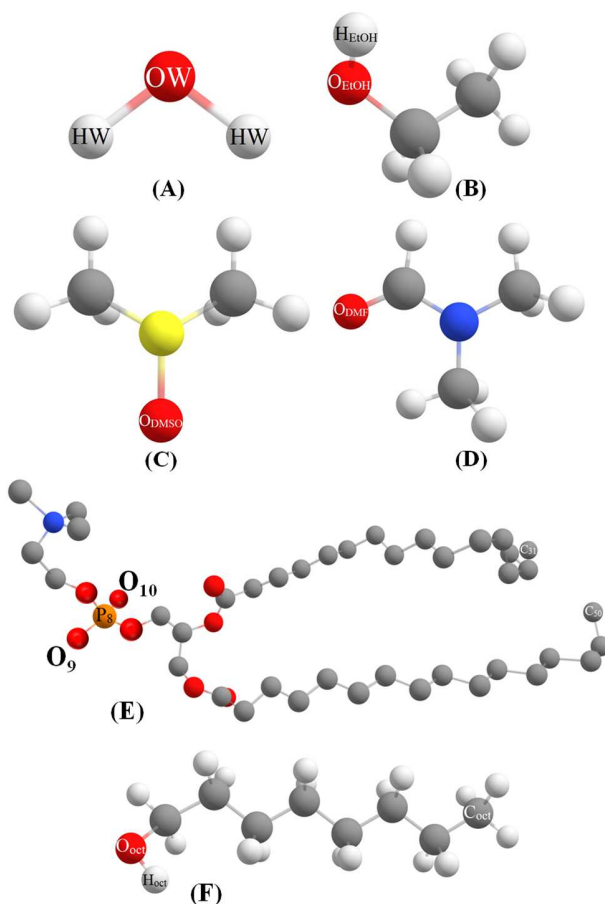

**Fig. S1** DFT-calculated optimized structures of (A) water, (B) EtOH, (C) DMSO, (D) DMF, (E) DPPC, and (F) octanol molecules with atom labelling.

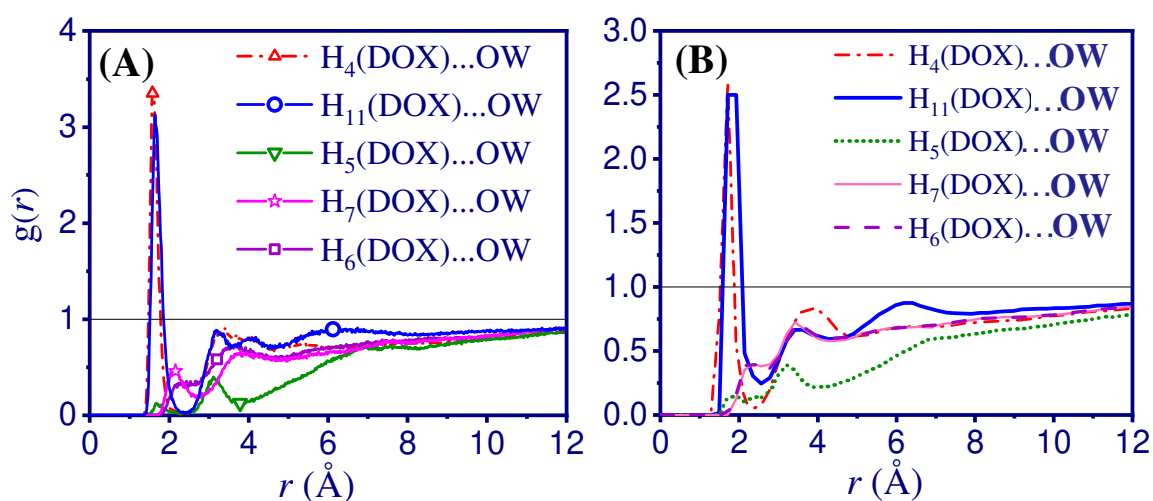

**Fig. S2** Radial distribution functions (RDFs) of DOX-water interactions using calculated charges, (A) from the NBO method, and (B) from the CHELPG method.

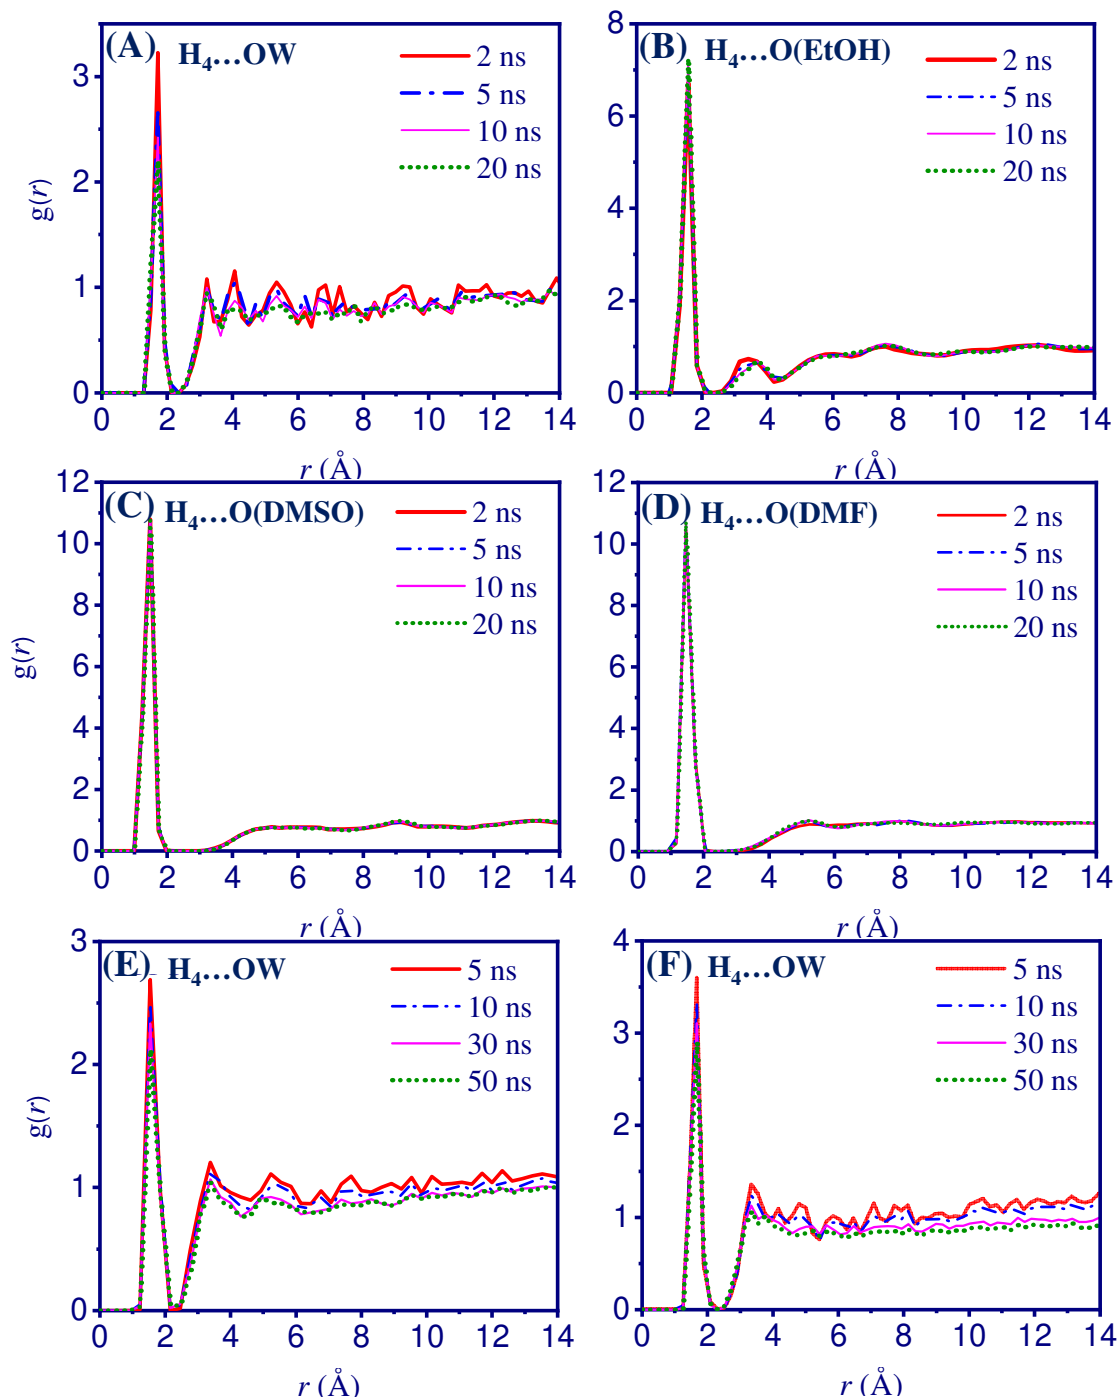

**Fig. S3** Calculated radial distribution functions (RDFs) of DOX in (A) water, (B) EtOH, (C) DMSO, (D) DMF, (E) at the water/DPPC interface, and (F) at the water/octanol interface at different simulation times.

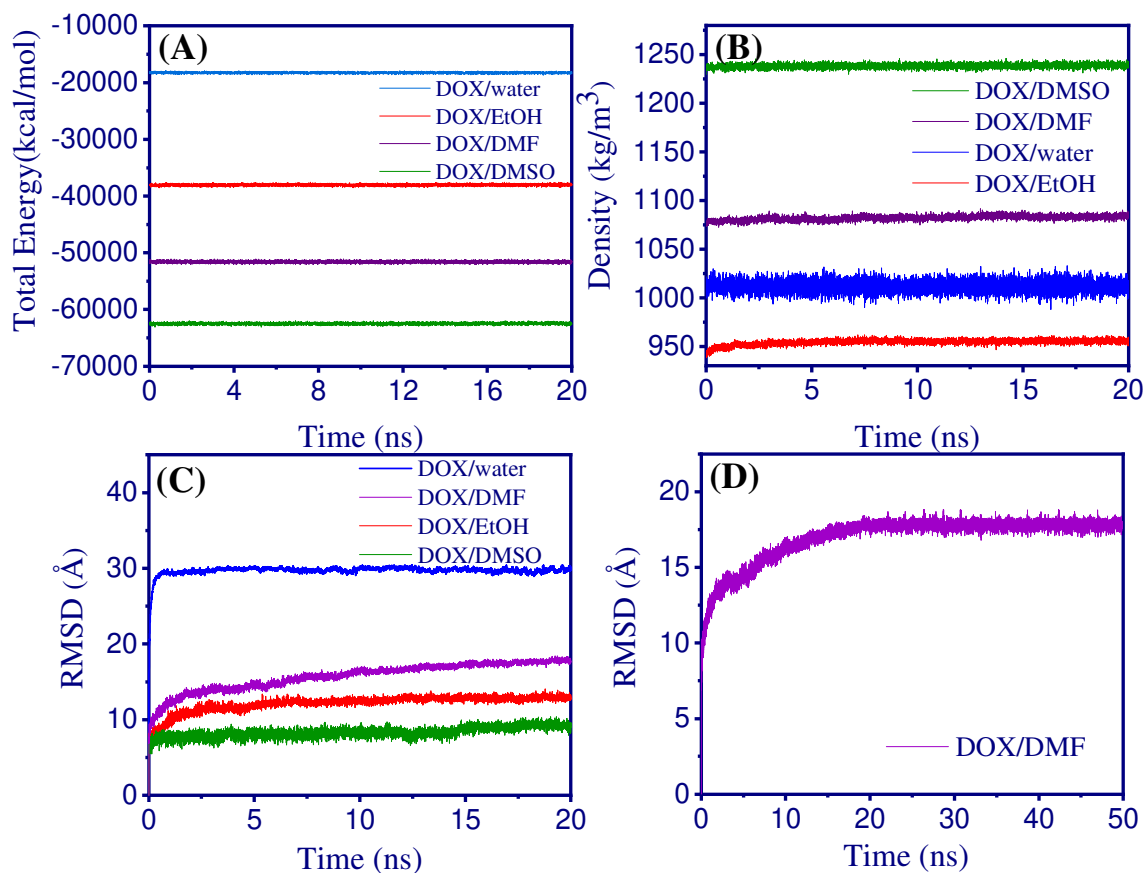

**Fig. S4** (A) Total energy, (B) Density, and (C) *RMSDs* of the DOX/water, DOX/EtOH, DOX/DMSO and DOX/DMF systems, and (D) *RMSDs* of DOX/DMF, showing the equilibration of the systems during the simulation time.

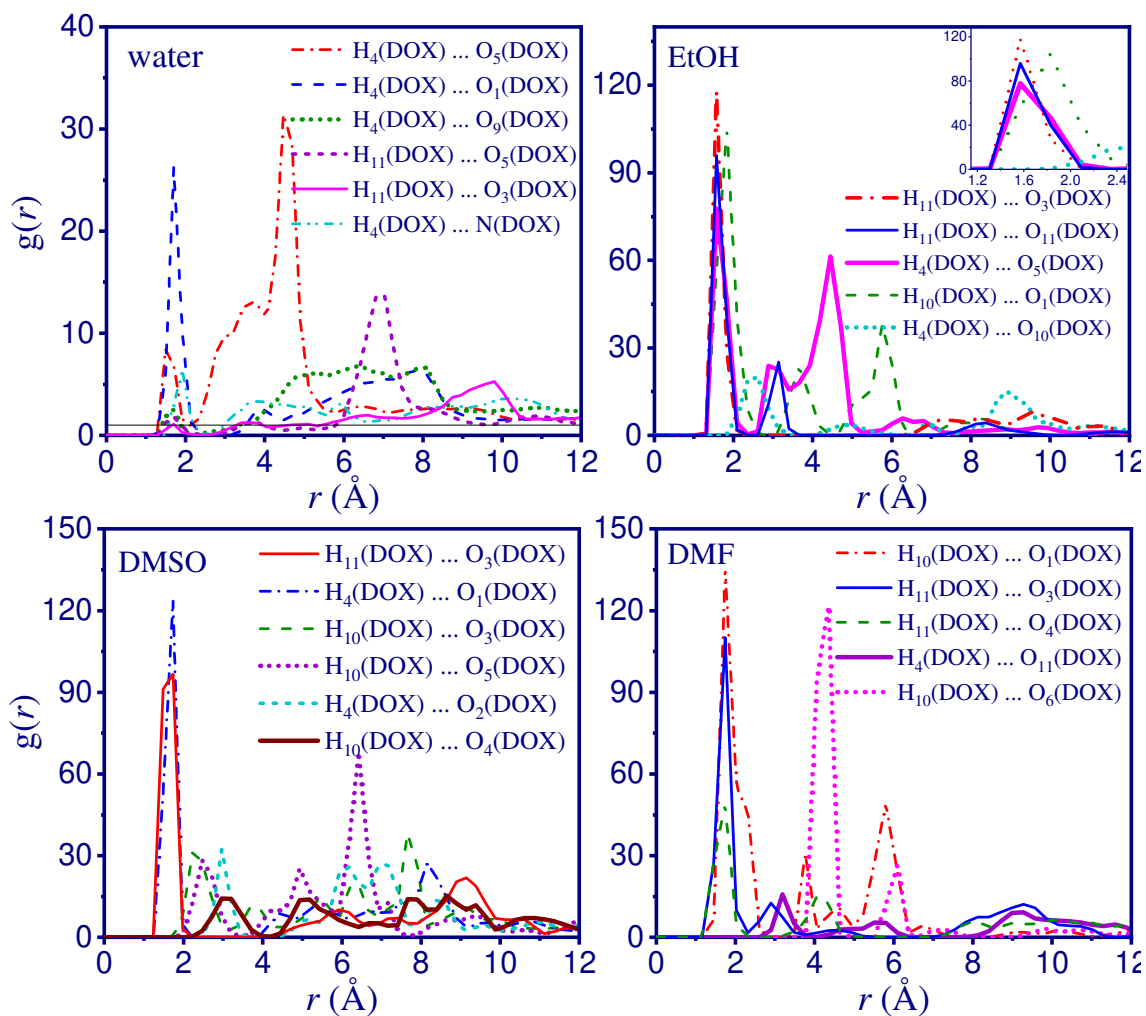

Fig. S5 Most probable RDFs between selected DOX H atoms and DOX O or N atoms in different solvents.

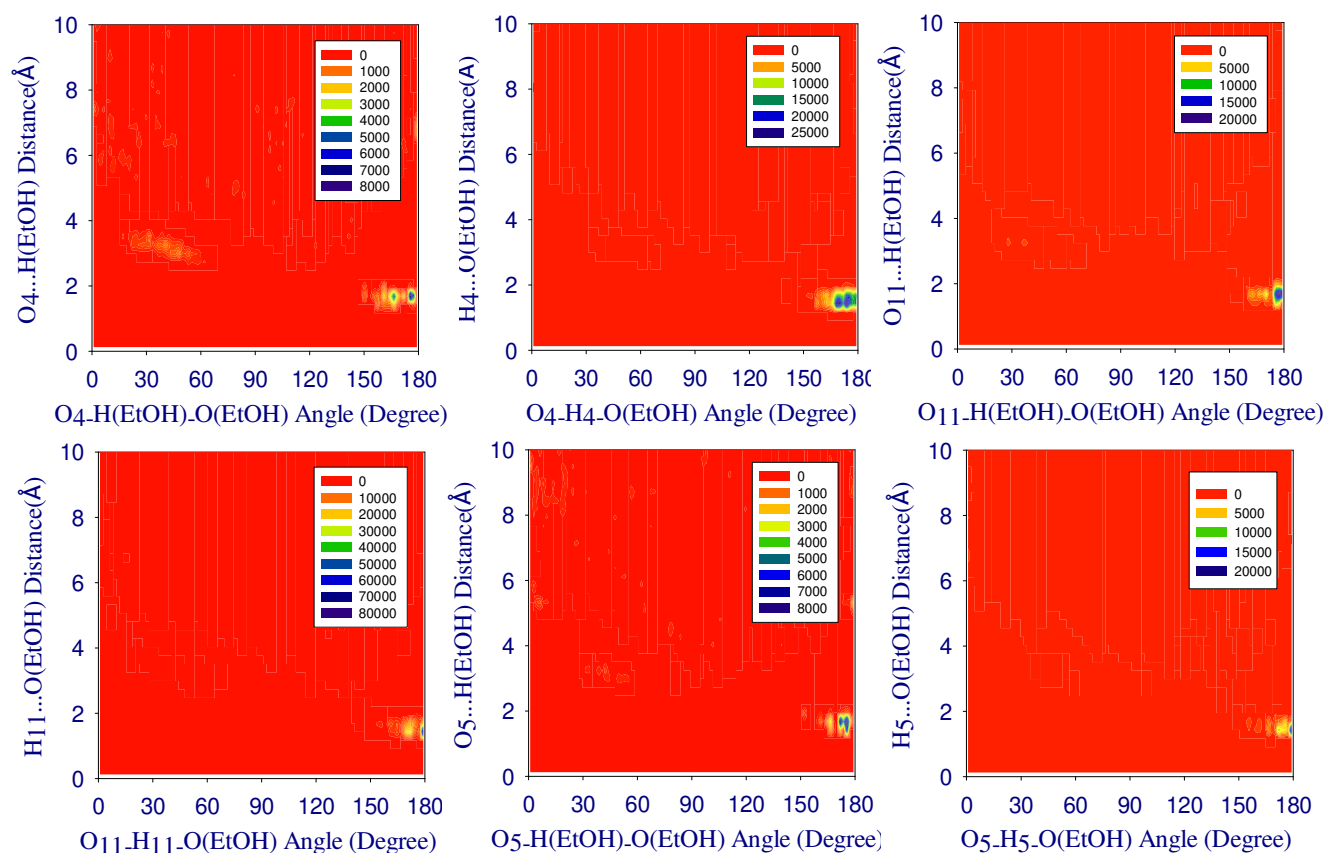

**Fig. S6** Combined distribution functions (*CDFs*) of the angular distribution functions (*ADFs*) (x-axis) and radial distribution functions (*RDFs*) (y-axis) for the hydrogen bonds of DOX molecules in EtOH. The probability values were not normalised such that the highest probability value is not equal in each case and the colour scheme ranges from red (low probability) to dark blue (high probability).

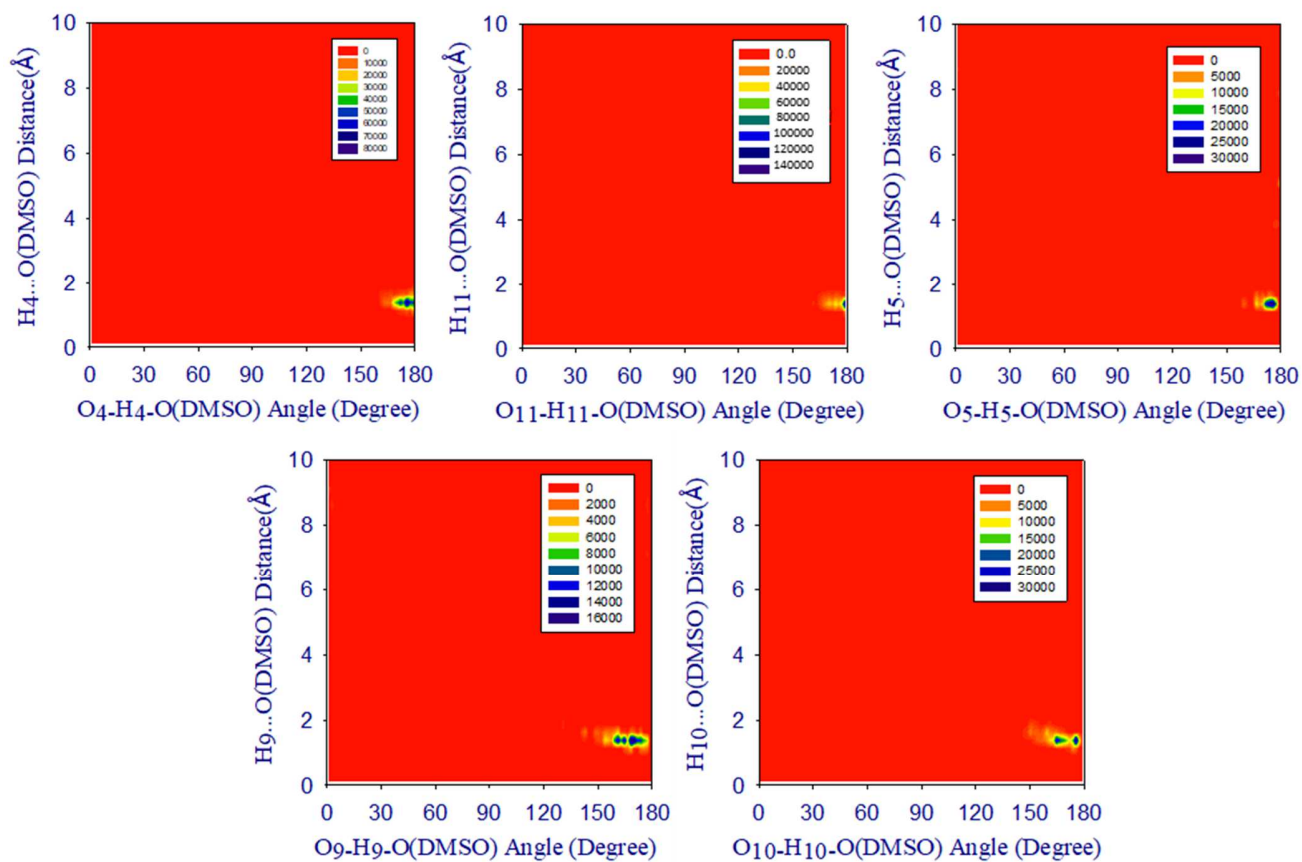

**Fig. S7** CDFs of the ADFs (x-axis) and RDFs (y-axis) for the hydrogen bonds of DOX molecules in DMSO. The probability values were not normalised such that the highest probability value is not equal in each case and the colour scheme ranges from red (low probability) to dark blue (high probability).



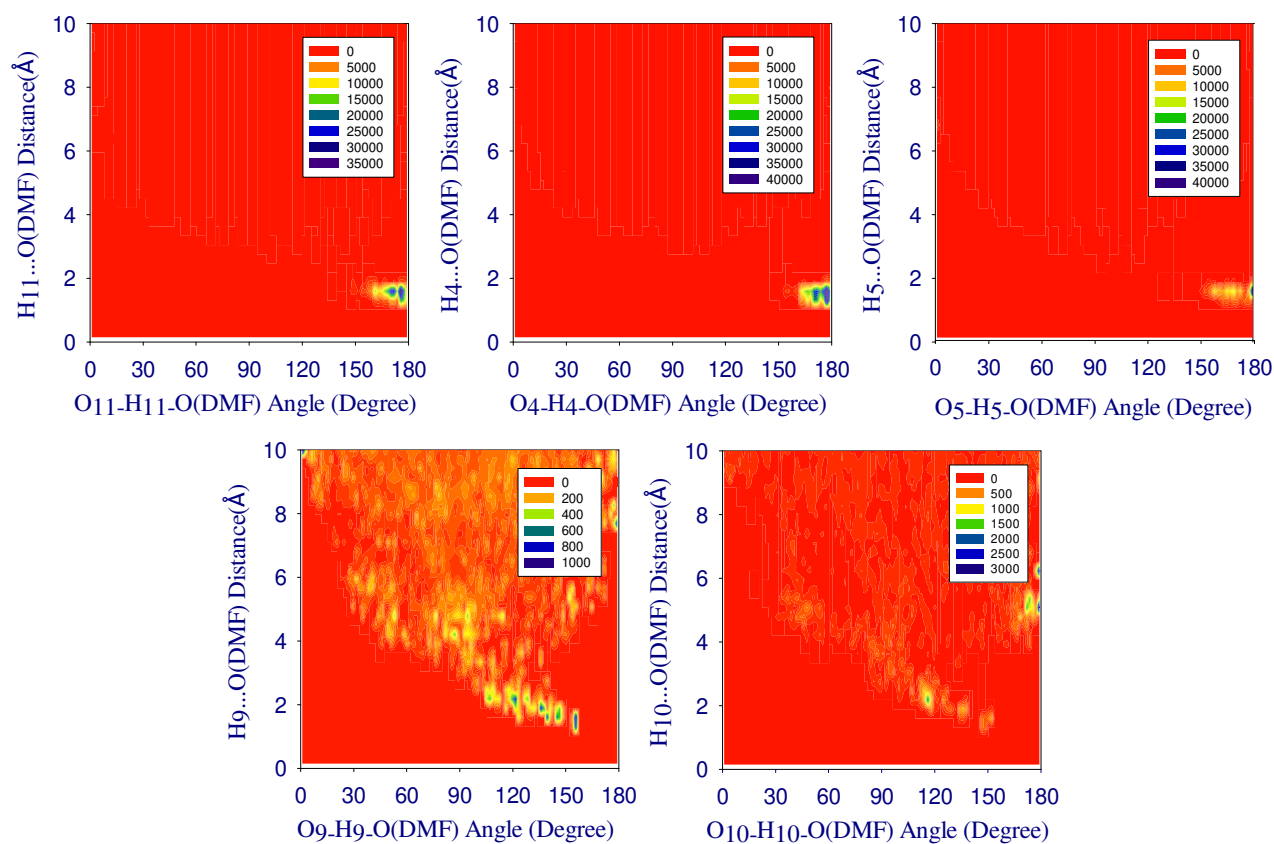

**Fig. S8** CDFs of the ADFs (x-axis) and RDFs (y-axis) for the hydrogen bonds of DOX molecules in DMF. The probability values were not normalised such that the highest probability value is not equal in each case and the colour scheme ranges from red (low probability) to dark blue (high probability).

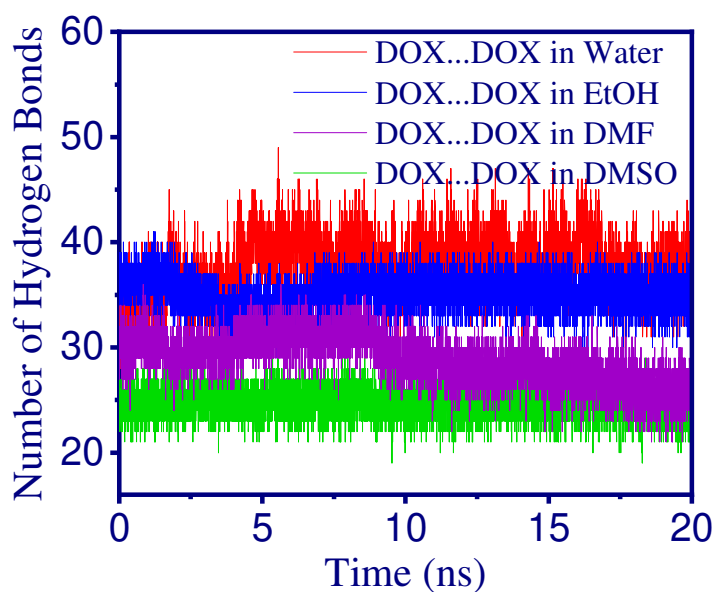

**Fig. S9** Number of hydrogen bonds between DOX...DOX in different solvents.

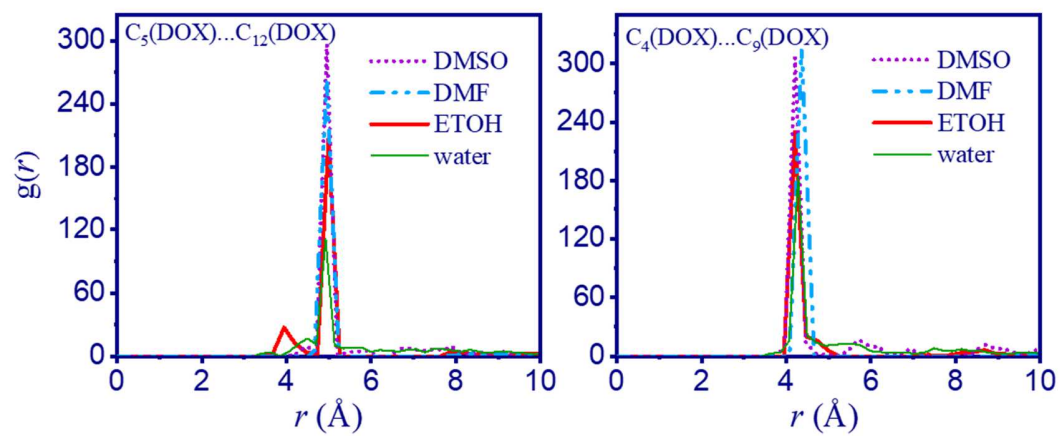

Fig. S10 DOX-DOX RDFs between DOX C atoms in different solvents.

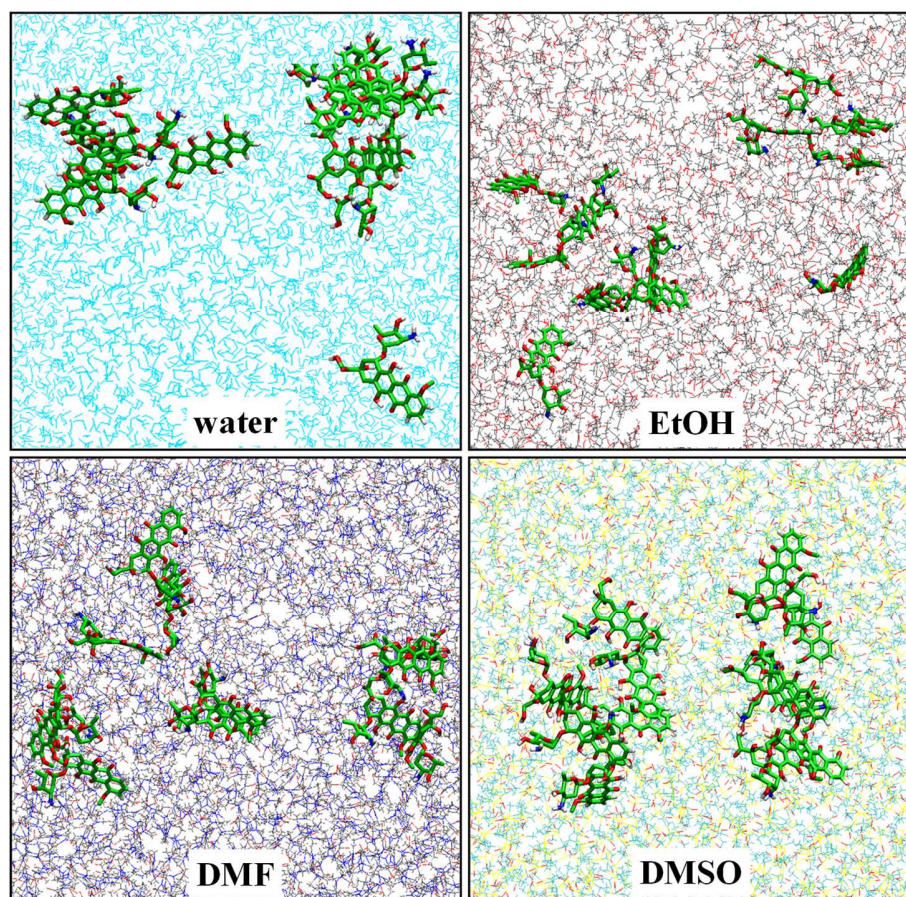

Fig. S11 Representative simulation snapshots of DOX in different solvents after 30 ns.

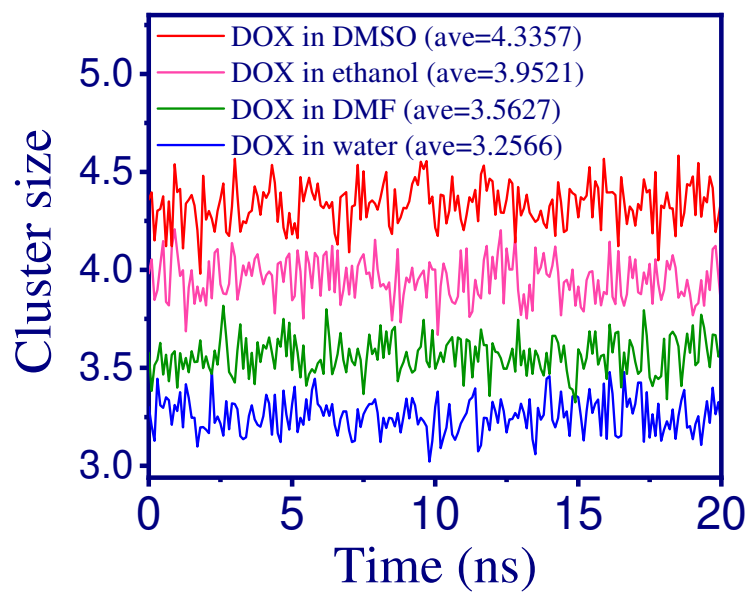

Fig. S12 Average cluster sizes of DOX in different solvents.

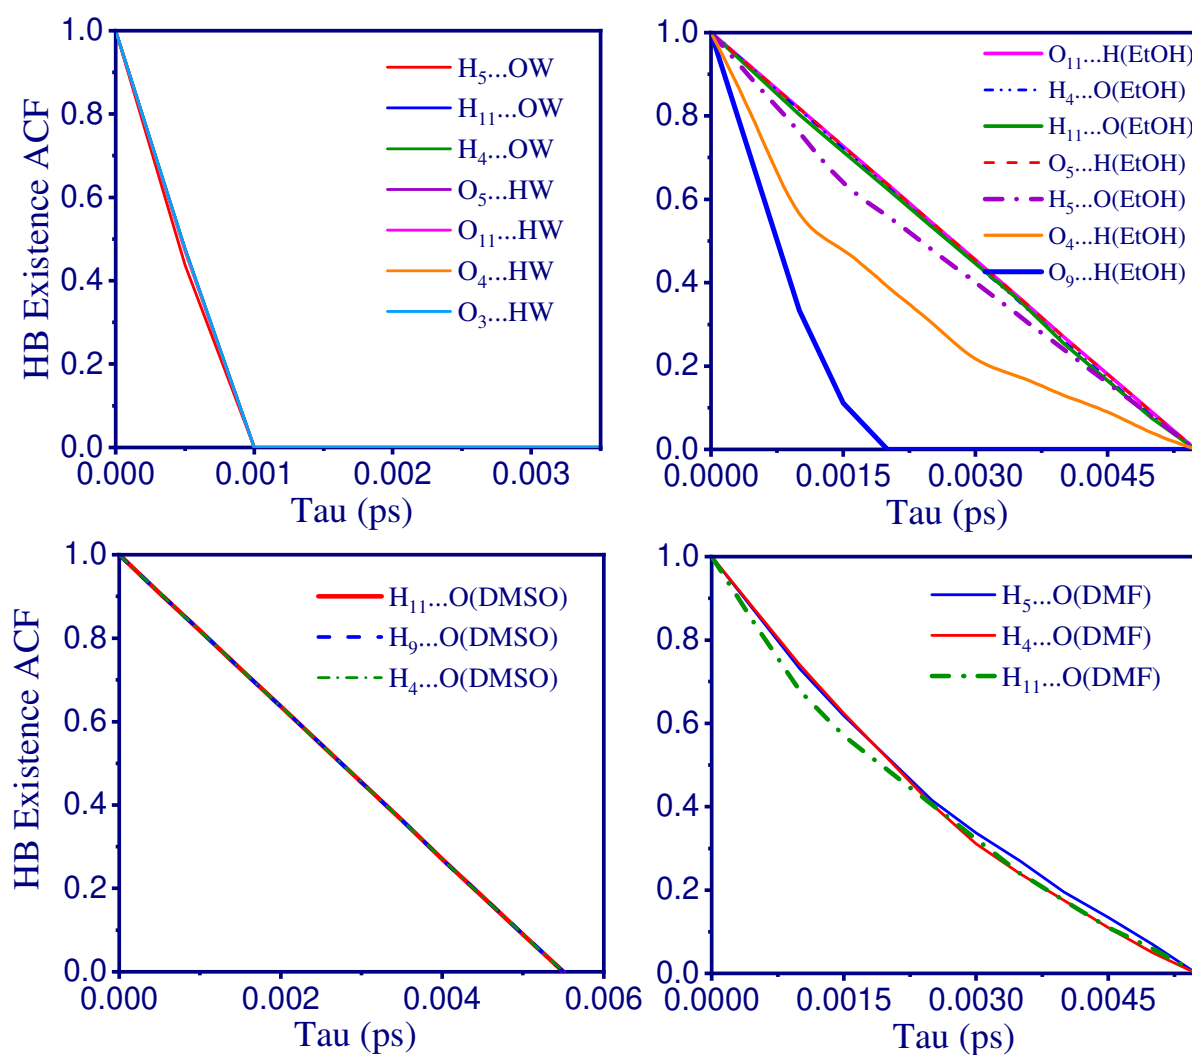

**Fig. S13** Average HB Existence autocorrelation functions (ACFs) of DOX in (A) water, (B) EtOH, (C) DMSO, and (D) DMF.

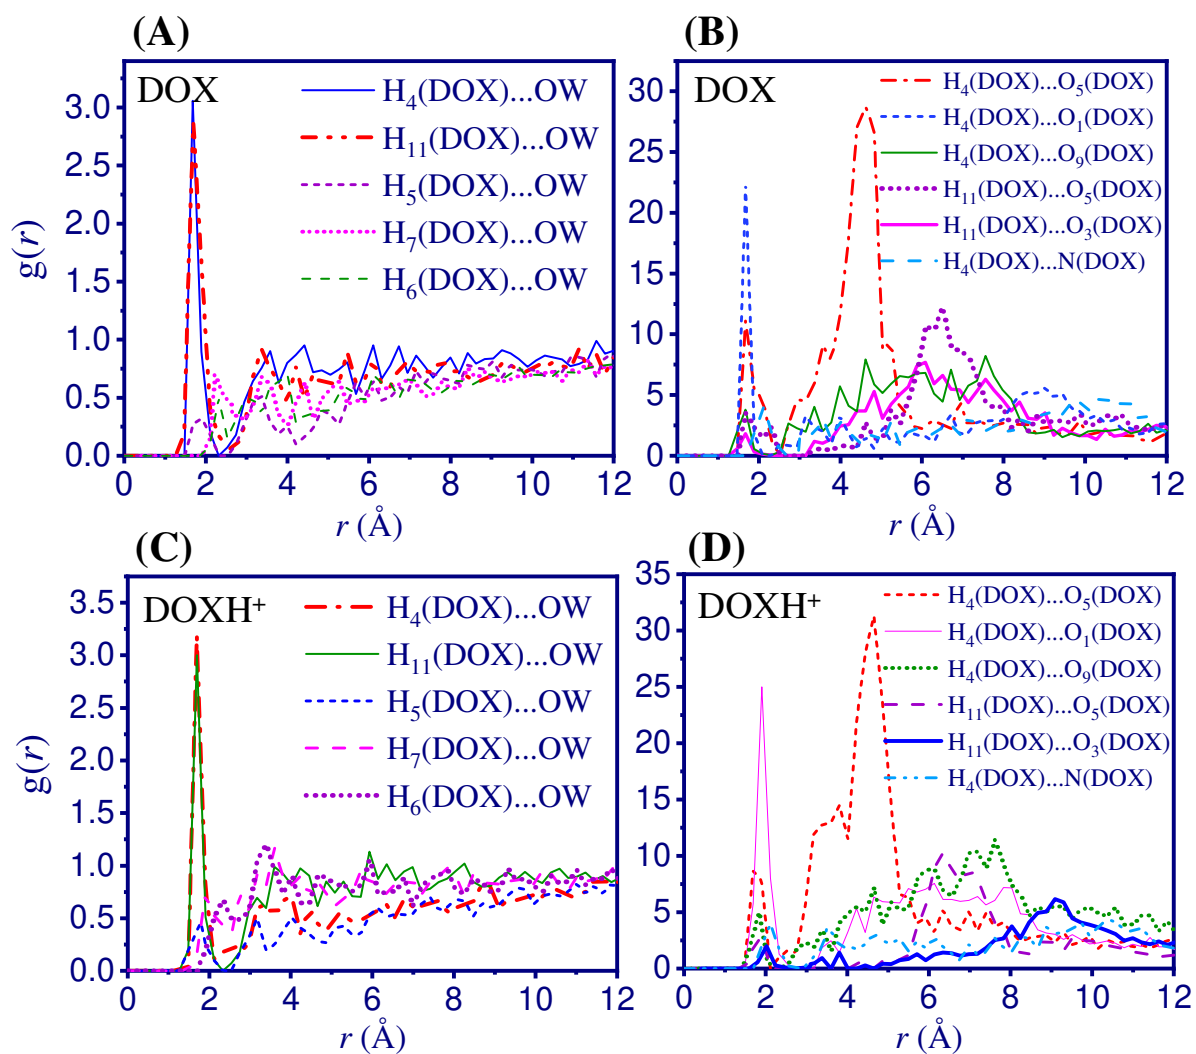

**Fig. S14** RDFs of (A) neutral DOX atoms with water, (B) selected neutral DOX H atoms and DOX O or N atoms, (C) protonated DOX (DOXH<sup>+</sup>) atoms with water, and (D) selected protonated DOX (DOXH<sup>+</sup>) atoms and DOX O or N atoms using Amber force field.

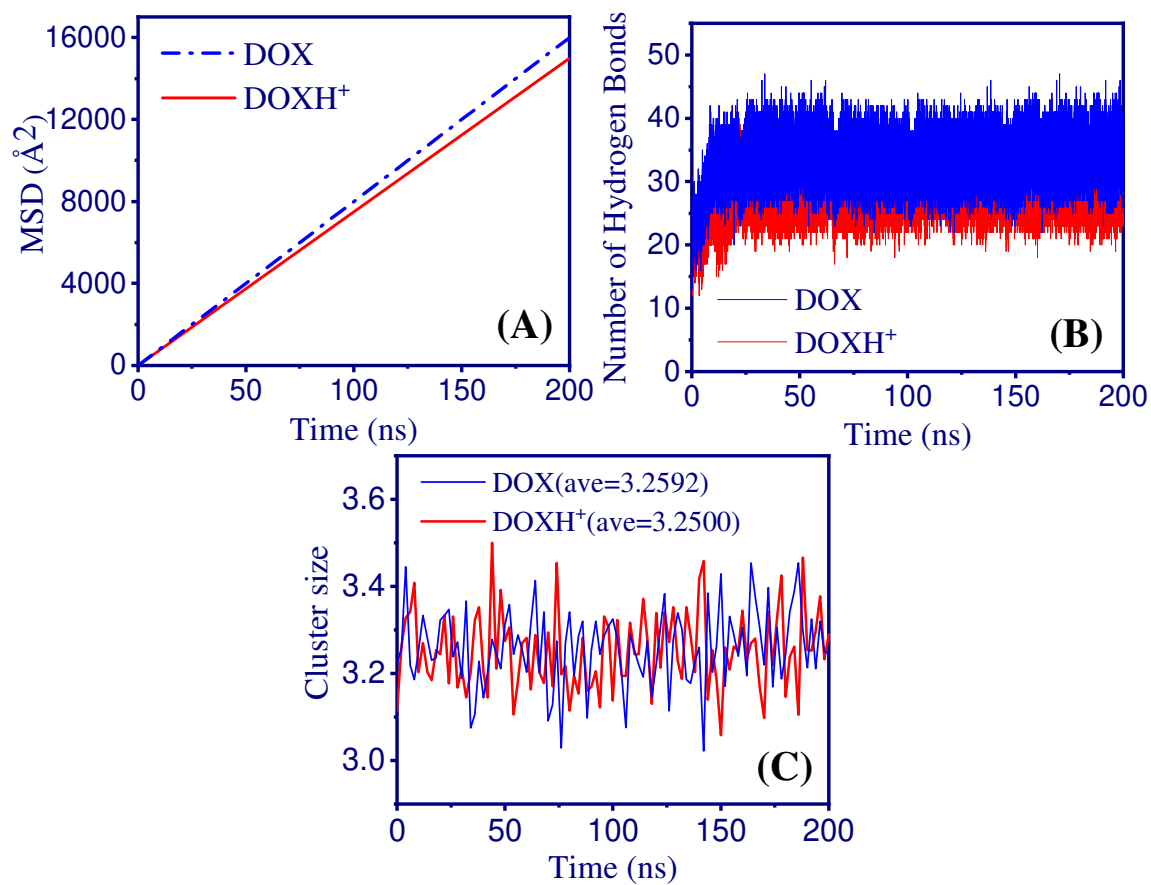

**Fig. S15** (A) Mean-square displacement (*MSD*) of the geometrical centre of DOX, (B) Number of hydrogen bonds between DOX···DOX, and (C) Average cluster sizes of neutral DOX (DOX) and protonated DOX (DOXH<sup>+</sup>) in water using Amber force field.

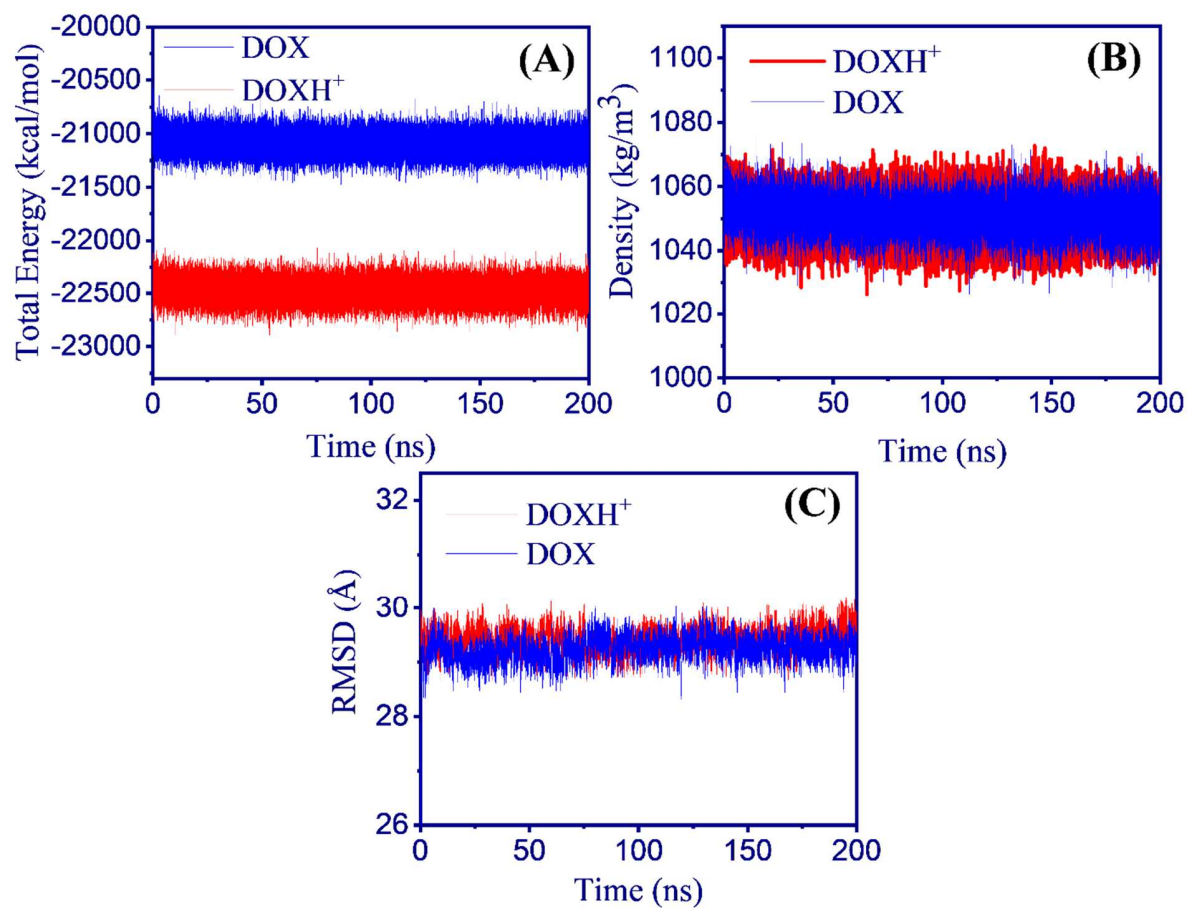

**Fig. S16** (A) Total energy, (B) Density, and (C) *RMSDs* of DOX/water system for neutral DOX (DOX) and protonated DOX (DOXH<sup>+</sup>) using Amber force field, showing the equilibration of the systems during the simulation time.

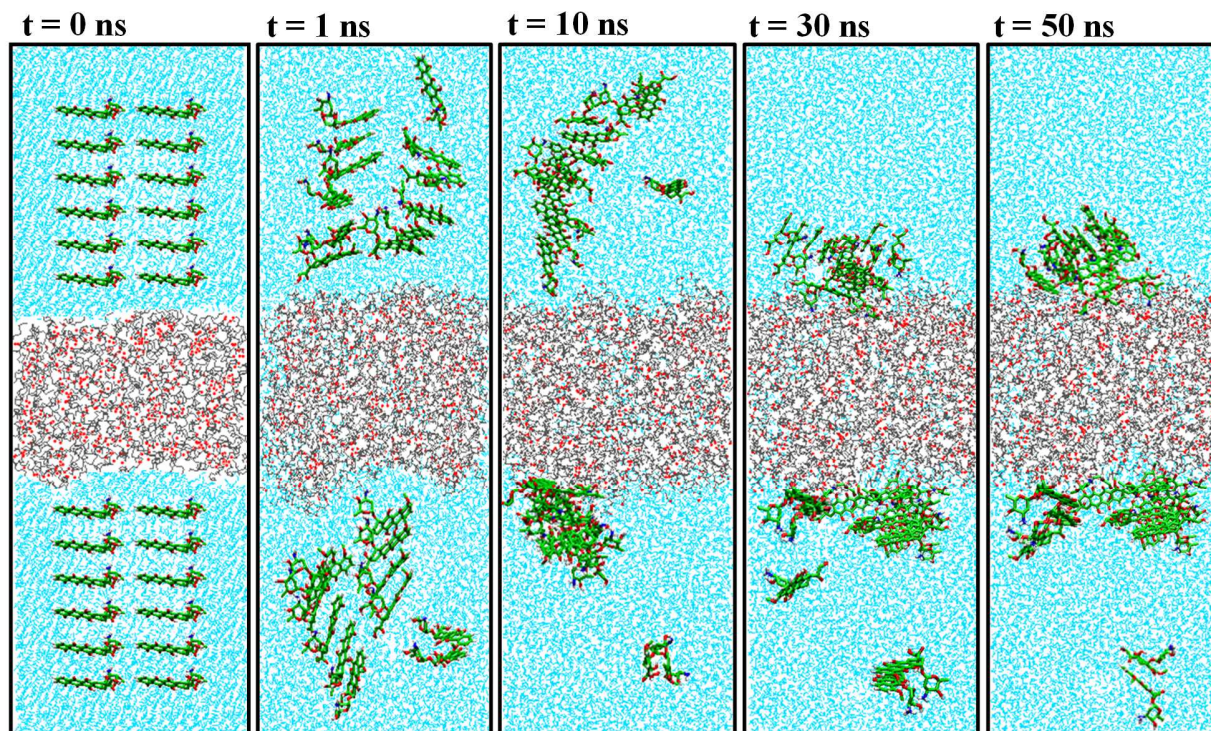

**Fig. S17** Representative simulation snapshots of DOX at octanol/water interfaces at different simulation times. The DOX atoms are shown as green (C), red (O), and blue (N) balls. The hydrocarbon chains of octanol are shown in grey, while the hydroxy groups are depicted in red. The water phase is in cyan.

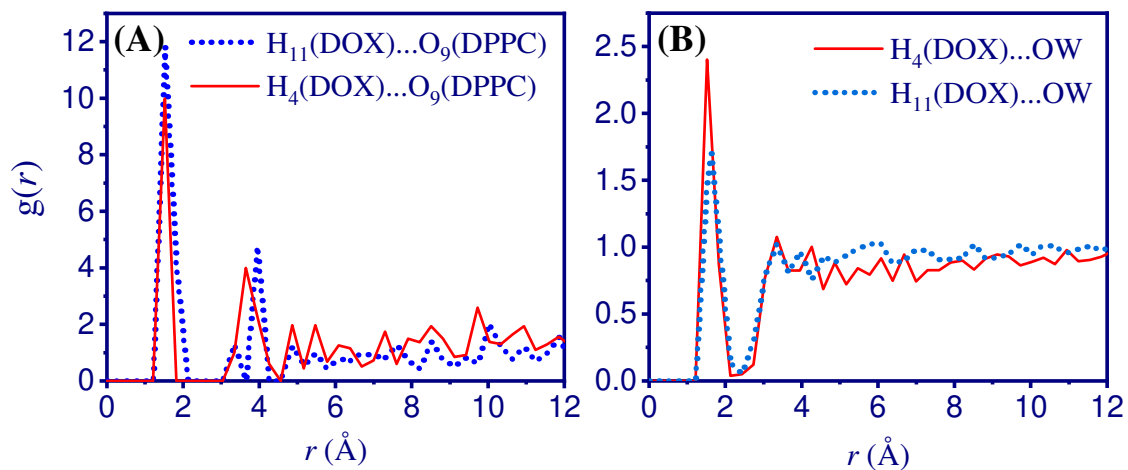

**Fig. S18** RDFs of (A) DOX H atoms with  $O_9$  of DPPC, and (B) DOX H atoms with the water O atom in the system of DOX/water/DPPC after 300 ns.



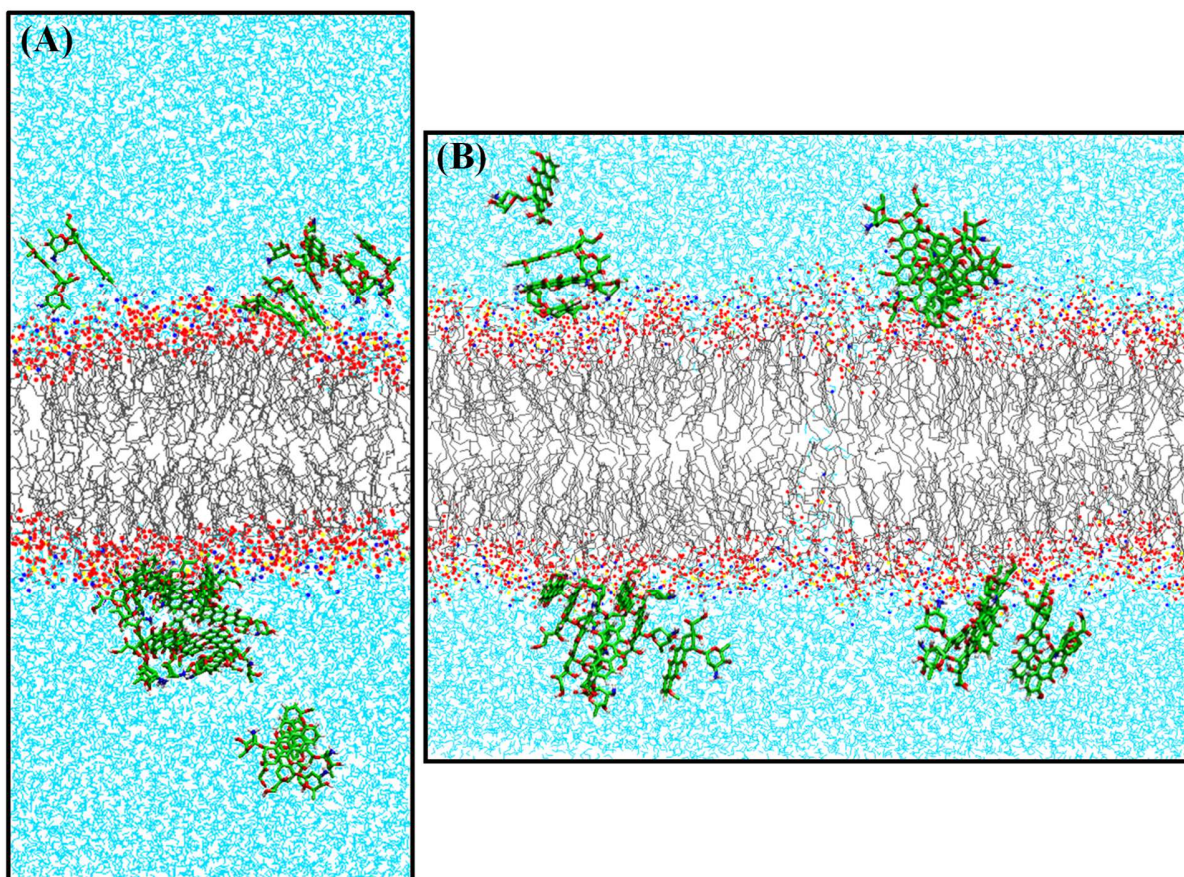

**Fig. S19** Representative simulation snapshots of DOX at DPPC/water interfaces (A) with 128, and (B) with 256 lipid molecules after 300 ns. The DOX atoms are shown as green (C), red (O), and blue (N) balls. The hydrocarbon chains of octanol are shown in grey, while the hydroxy groups are depicted in red. The water phase is in cyan.

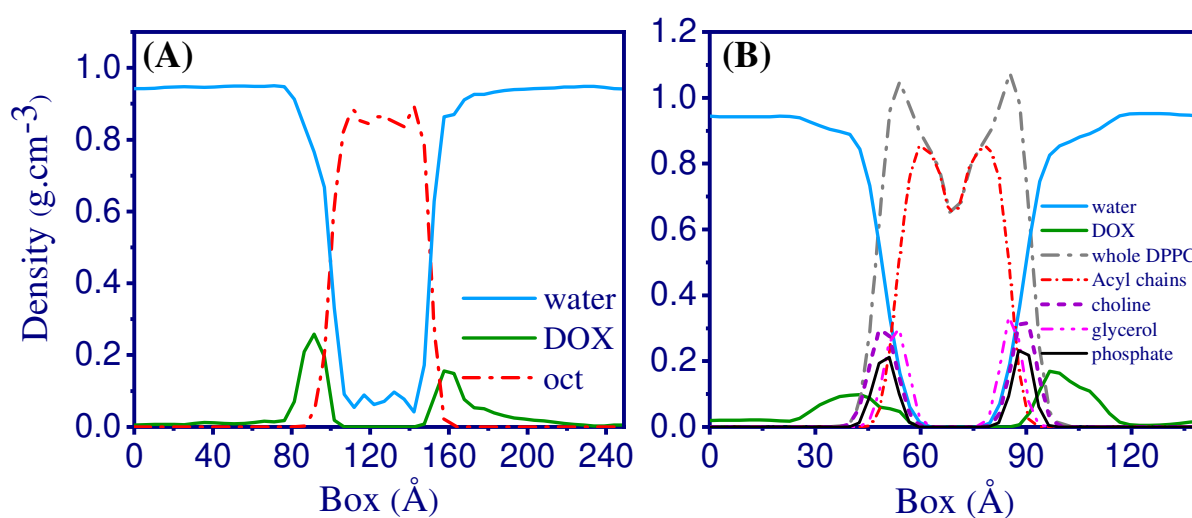

**Fig. S20** Total density profiles of the (A) octanol/DOX/water, and (B) DPPC/DOX/water systems.

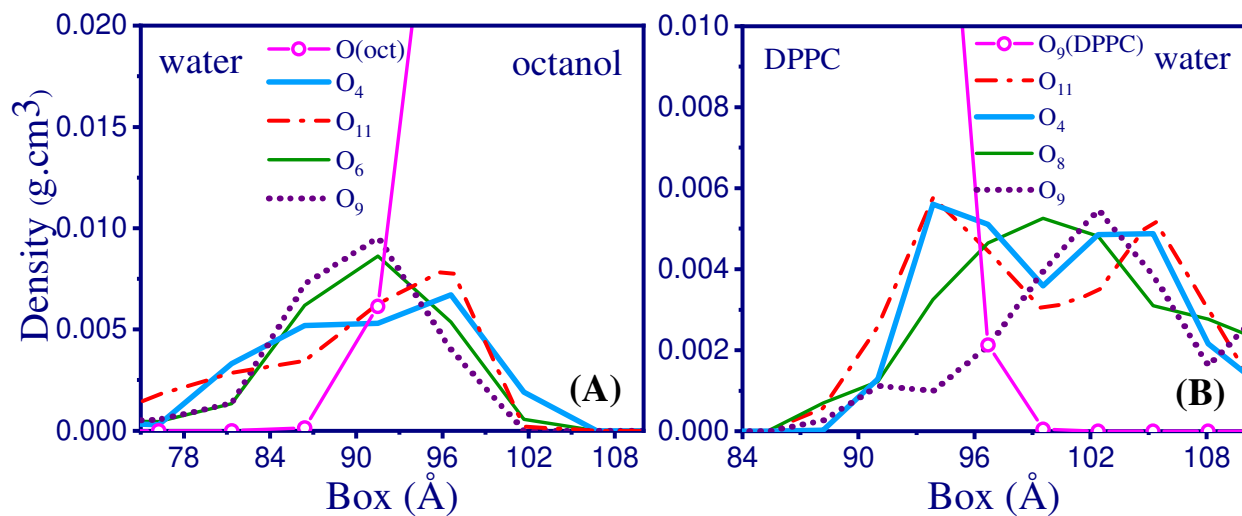

Fig. S21 Atomic density profiles of the (A) octanol/DOX/water, and (B) DPPC/DOX/water systems.

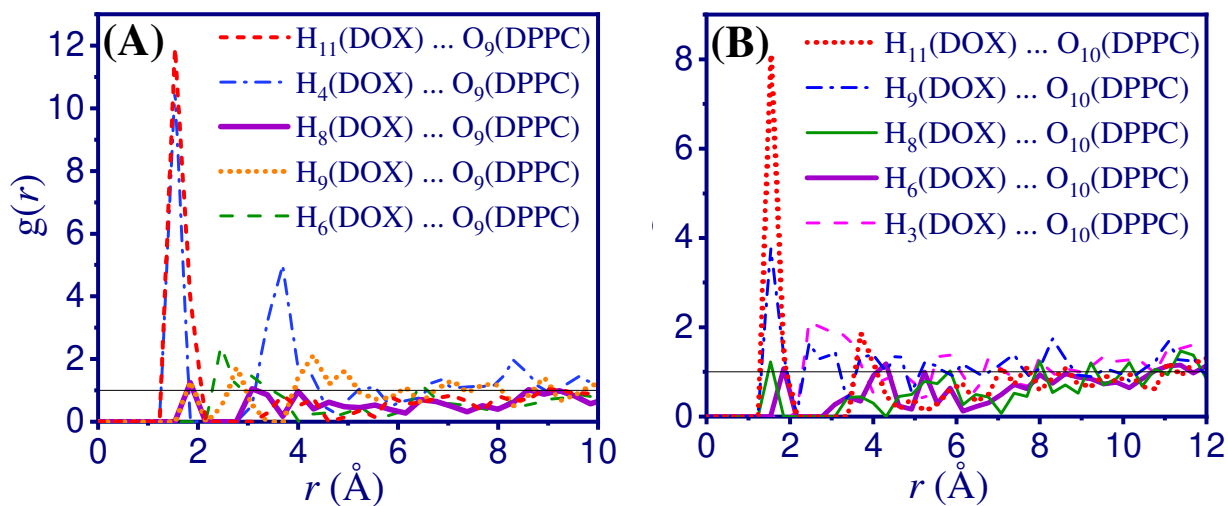

Fig. S22 DOX-DPPC RDFs DOX H atoms with (A) O<sub>9</sub>, and (B) O<sub>10</sub> of DPPC.

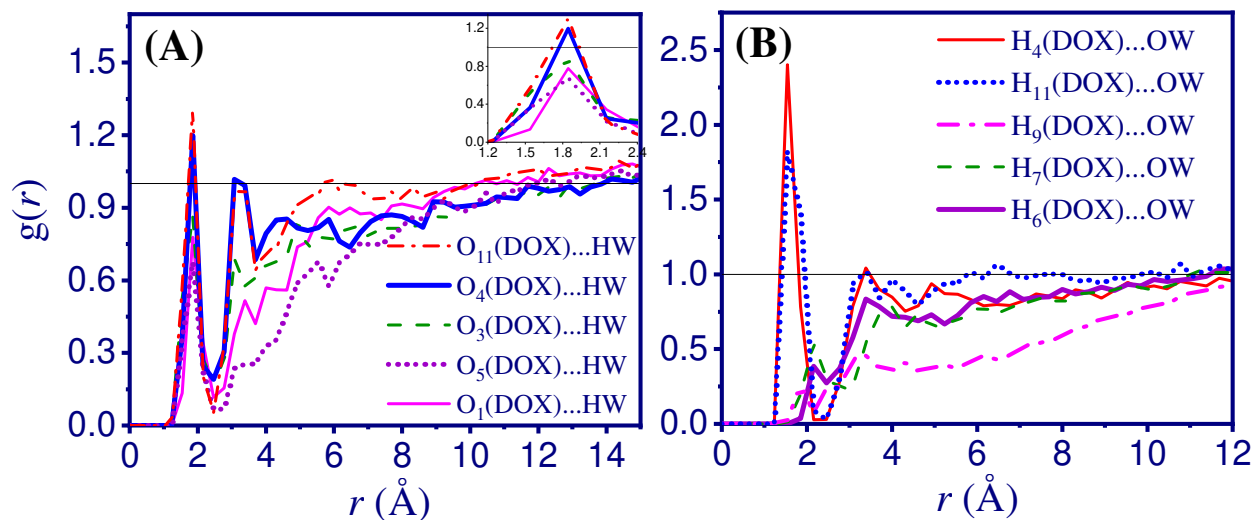

**Fig. S23** DOX-water RDFs in the DPPC/DOX/water system. (A) DOX O atoms with water H atoms, and (B) DOX H atoms with the water O atom.

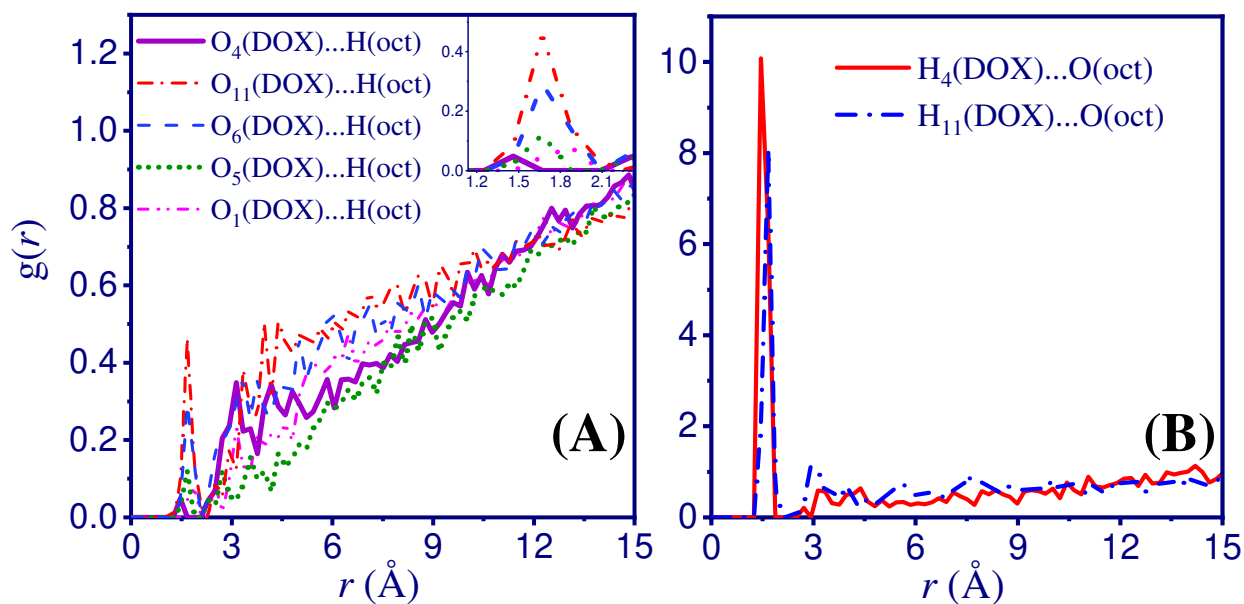

**Fig. S24** DOX-octanol RDFs in the octanol/DOX/water system, (A) DOX O atoms with octanol H atoms, and (B) DOX H atoms with the octanol O atom.

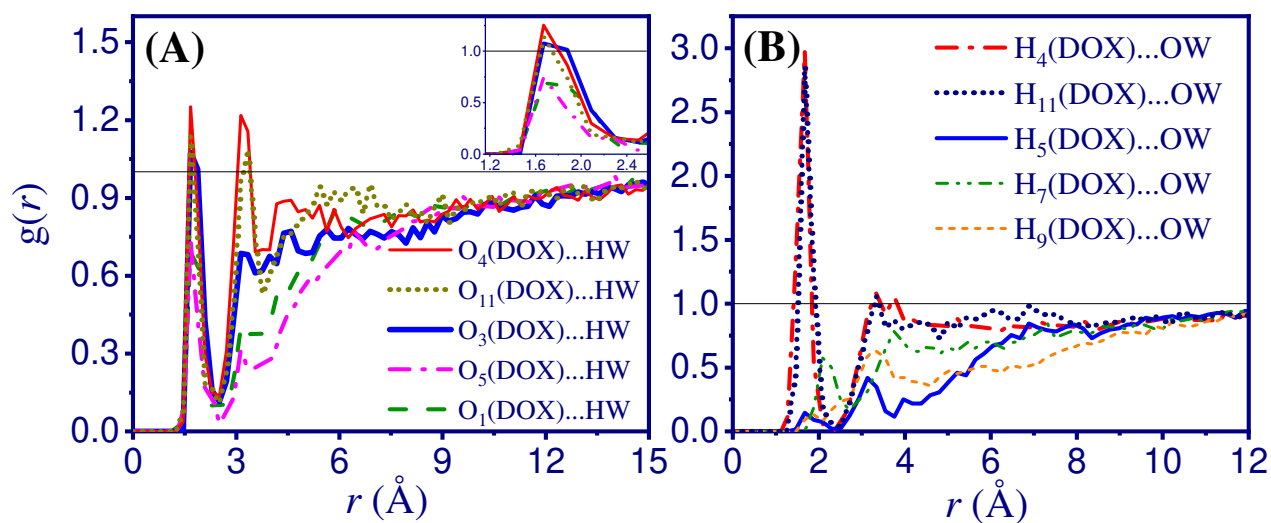

**Fig. S25** DOX-water *RDFs* in the octanol/DOX/water system. (A) DOX O atoms with water H atoms, and (B) DOX H atoms of with the water O atom.

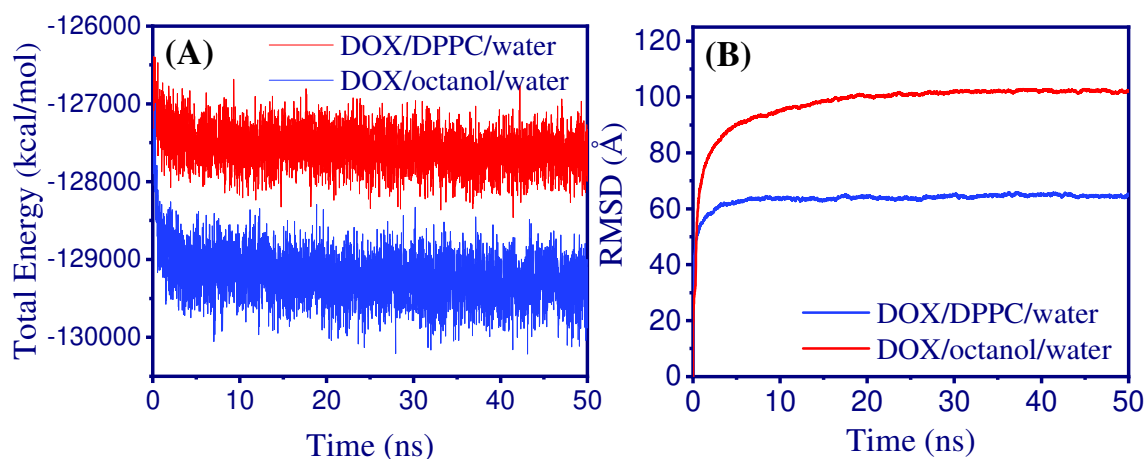

**Fig. S26** (A) Total energy, and (B) *RMSDs* of the DOX/octanol/water and DOX/DPPC/water systems, indicating the system's equilibration during the simulation time.

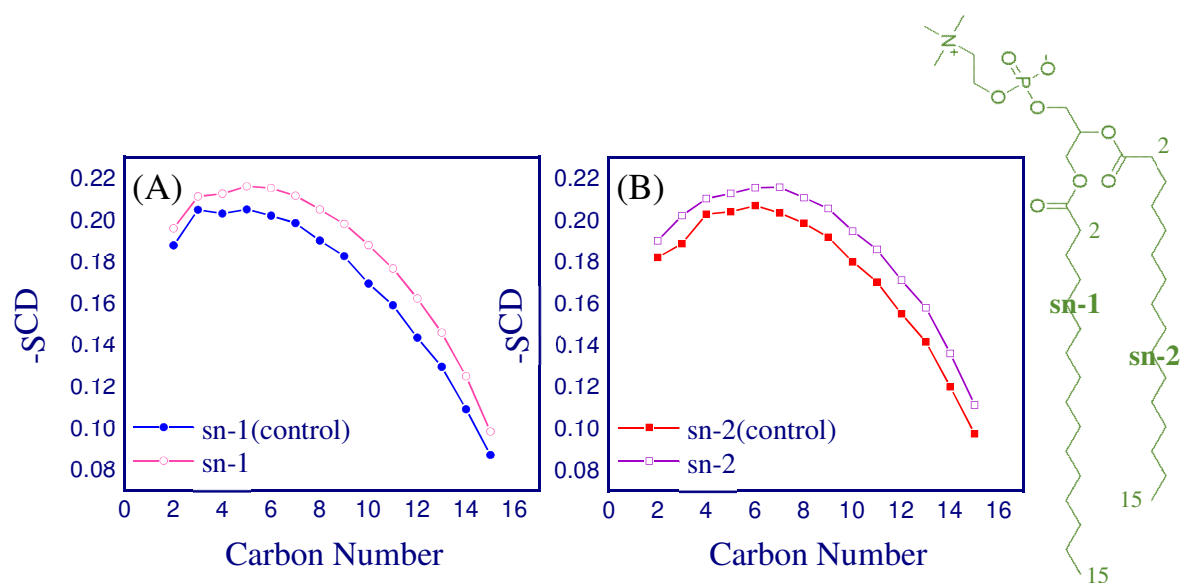

**Fig. S27** Average deuterium order parameters obtained for the sn-1 and sn-2 chains of DPPC. The chemical formula of DPPC and the numbering of the C atoms in the chain is shown to the right.

## Supporting Tables

**Table S1** DFT-calculated partial atomic charges of DOX using the NBO method.

| Atom            | q/e<br>B3LYP<br>NBO | Atom            | q/e<br>B3LYP<br>NBO | Atom            | q/e<br>B3LYP<br>NBO | Atom            | q/e<br>B3LYP<br>NBO |
|-----------------|---------------------|-----------------|---------------------|-----------------|---------------------|-----------------|---------------------|
| C <sub>1</sub>  | -0.258              | C <sub>14</sub> | -0.087              | C <sub>27</sub> | 0.339               | H <sub>1</sub>  | 0.210               |
| C <sub>2</sub>  | -0.218              | C <sub>15</sub> | 0.032               | O <sub>1</sub>  | -0.642              | H <sub>2</sub>  | 0.215               |
| C <sub>3</sub>  | -0.201              | C <sub>16</sub> | 0.182               | O <sub>2</sub>  | -0.590              | H <sub>3</sub>  | 0.268               |
| C <sub>4</sub>  | -0.112              | C <sub>17</sub> | 0.041               | O <sub>3</sub>  | -0.585              | H <sub>4</sub>  | 0.512               |
| C <sub>5</sub>  | -0.149              | C <sub>18</sub> | 0.296               | O <sub>4</sub>  | -0.763              | H <sub>5</sub>  | 0.519               |
| C <sub>6</sub>  | 0.363               | C <sub>19</sub> | 0.555               | O <sub>5</sub>  | -0.766              | H <sub>6</sub>  | 0.380               |
| C <sub>7</sub>  | 0.551               | C <sub>20</sub> | 0.297               | O <sub>6</sub>  | -0.570              | H <sub>7</sub>  | 0.393               |
| C <sub>8</sub>  | 0.547               | C <sub>21</sub> | 0.607               | O <sub>7</sub>  | -0.520              | H <sub>8</sub>  | 0.109               |
| C <sub>9</sub>  | -0.152              | C <sub>22</sub> | 0.017               | O <sub>8</sub>  | -0.526              | H <sub>9</sub>  | 0.505               |
| C <sub>10</sub> | 0.391               | C <sub>23</sub> | 0.135               | O <sub>9</sub>  | -0.669              | H <sub>10</sub> | 0.528               |
| C <sub>11</sub> | -0.107              | C <sub>24</sub> | 0.28                | O <sub>10</sub> | -0.689              | H <sub>11</sub> | 0.503               |
| C <sub>12</sub> | -0.137              | C <sub>25</sub> | 0.299               | O <sub>11</sub> | -0.779              |                 |                     |
| C <sub>13</sub> | 0.352               | C <sub>26</sub> | 0.031               | N               | -0.937              |                 |                     |

**Table S2** DFT-calculated partial atomic charges of EtOH.

| Atom              | q/e<br>B3LYP<br>NBO | Atom | q/e<br>B3LYP<br>NBO |
|-------------------|---------------------|------|---------------------|
| C                 | -0.125              | H    | 0.198               |
| C                 | -0.72               | H    | 0.241               |
| O <sub>EtOH</sub> | -0.776              | H    | 0.243               |
| H <sub>EtOH</sub> | 0.487               | H    | 0.227               |
| H                 | 0.225               |      |                     |

**Table S3** DFT-calculated partial atomic charges of DMSO.

| Atom              | q/e<br>B3LYP<br>NBO | Atom | q/e<br>B3LYP<br>NBO |
|-------------------|---------------------|------|---------------------|
| C                 | -0.896              | H    | 0.257               |
| C                 | -0.896              | H    | 0.251               |
| O <sub>DMSO</sub> | -0.967              | H    | 0.269               |
| S                 | 1.205               | H    | 0.251               |
| H                 | 0.269               | H    | 0.257               |

**Table S4** DFT-calculated partial atomic charges of DMF.

| Atom             | q/e<br>B3LYP<br>NBO | Atom | q/e<br>B3LYP<br>NBO |
|------------------|---------------------|------|---------------------|
| C                | 0.518               | H    | 0.231               |
| C                | -0.467              | H    | 0.239               |
| C                | -0.482              | H    | 0.231               |
| O <sub>DMF</sub> | -0.635              | H    | 0.228               |
| N                | -0.51               | H    | 0.271               |
| H                | 0.148               | H    | 0.228               |

**Table S5** DFT-calculated partial atomic charges of octanol.

| Atom             | q/e<br>B3LYP<br>NBO | Atom             | q/e<br>B3LYP<br>NBO | Atom | q/e<br>B3LYP<br>NBO |
|------------------|---------------------|------------------|---------------------|------|---------------------|
| C <sub>oct</sub> | -0.684              | H <sub>oct</sub> | 0.489               | H    | 0.230               |
| C                | -0.472              | H                | 0.238               | H    | 0.233               |
| C                | -0.462              | H                | 0.231               | H    | 0.231               |
| C                | -0.461              | H                | 0.231               | H    | 0.230               |
| C                | -0.460              | H                | 0.231               | H    | 0.224               |
| C                | -0.468              | H                | 0.231               | H    | 0.242               |
| C                | -0.496              | H                | 0.230               | H    | 0.238               |
| C                | -0.114              | H                | 0.230               | H    | 0.228               |
| O <sub>oct</sub> | -0.776              | H                | 0.230               | H    | 0.196               |

**Table S6** DFT-calculated partial atomic charges of DOX using the CHELPG method.

| Atom            | CHELPG | Atom            | CHELPG | Atom            | CHELPG | Atom            | CHELPG |
|-----------------|--------|-----------------|--------|-----------------|--------|-----------------|--------|
| C <sub>1</sub>  | -0.149 | C <sub>14</sub> | 0.610  | C <sub>27</sub> | 0.006  | H <sub>1</sub>  | 0.139  |
| C <sub>2</sub>  | -0.095 | C <sub>15</sub> | -0.610 | O <sub>1</sub>  | -0.074 | H <sub>2</sub>  | 0.100  |
| C <sub>3</sub>  | -0.005 | C <sub>16</sub> | 0.490  | O <sub>2</sub>  | -0.068 | H <sub>3</sub>  | 0.094  |
| C <sub>4</sub>  | -0.108 | C <sub>17</sub> | -0.285 | O <sub>3</sub>  | -0.650 | H <sub>4</sub>  | 0.421  |
| C <sub>5</sub>  | -0.143 | C <sub>18</sub> | 0.223  | O <sub>4</sub>  | -0.368 | H <sub>5</sub>  | 0.321  |
| C <sub>6</sub>  | 0.275  | C <sub>19</sub> | 1.105  | O <sub>5</sub>  | -0.657 | H <sub>6</sub>  | 0.299  |
| C <sub>7</sub>  | 0.496  | C <sub>20</sub> | -0.355 | O <sub>6</sub>  | -0.105 | H <sub>7</sub>  | 0.278  |
| C <sub>8</sub>  | 0.591  | C <sub>21</sub> | 0.006  | O <sub>7</sub>  | -0.386 | H <sub>8</sub>  | 0.250  |
| C <sub>9</sub>  | -0.205 | C <sub>22</sub> | -0.174 | O <sub>8</sub>  | -0.515 | H <sub>9</sub>  | 0.244  |
| C <sub>10</sub> | 0.380  | C <sub>23</sub> | -0.200 | O <sub>9</sub>  | -0.291 | H <sub>10</sub> | 0.319  |
| C <sub>11</sub> | -0.375 | C <sub>24</sub> | 0.066  | O <sub>10</sub> | -0.510 | H <sub>11</sub> | 0.349  |
| C <sub>12</sub> | -0.111 | C <sub>25</sub> | 0.224  | O <sub>11</sub> | -0.476 |                 |        |
| C <sub>13</sub> | 0.014  | C <sub>26</sub> | -0.174 | N               | -0.212 |                 |        |

**Table S7** DFT-calculated partial atomic charges of DOXH<sup>+</sup> using the RESP method.<sup>1</sup>

| Atom            | RESP   | Atom            | RESP   | Atom            | RESP   | Atom            | RESP  |
|-----------------|--------|-----------------|--------|-----------------|--------|-----------------|-------|
| C <sub>1</sub>  | -0.155 | C <sub>14</sub> | -0.062 | C <sub>27</sub> | 0.207  | H <sub>1</sub>  | 0.135 |
| C <sub>2</sub>  | -0.144 | C <sub>15</sub> | 0.157  | O <sub>1</sub>  | -0.347 | H <sub>2</sub>  | 0.178 |
| C <sub>3</sub>  | -0.105 | C <sub>16</sub> | 0.251  | O <sub>2</sub>  | -0.297 | H <sub>3</sub>  | 0.154 |
| C <sub>4</sub>  | -0.187 | C <sub>17</sub> | 0.042  | O <sub>3</sub>  | -0.509 | H <sub>4</sub>  | 0.429 |
| C <sub>5</sub>  | -0.163 | C <sub>18</sub> | 0.026  | O <sub>4</sub>  | -0.679 | H <sub>5</sub>  | 0.485 |
| C <sub>6</sub>  | 0.274  | C <sub>19</sub> | 0.416  | O <sub>5</sub>  | -0.755 | H <sub>6</sub>  | 0.488 |
| C <sub>7</sub>  | 0.624  | C <sub>20</sub> | 0.352  | O <sub>6</sub>  | -0.261 | H <sub>7</sub>  | 0.488 |
| C <sub>8</sub>  | 0.704  | C <sub>21</sub> | 0.274  | O <sub>7</sub>  | -0.573 | H <sub>8</sub>  | 0.126 |
| C <sub>9</sub>  | -0.178 | C <sub>22</sub> | 0.056  | O <sub>8</sub>  | -0.480 | H <sub>9</sub>  | 0.411 |
| C <sub>10</sub> | 0.127  | C <sub>23</sub> | 0.143  | O <sub>9</sub>  | -0.525 | H <sub>10</sub> | 0.388 |
| C <sub>11</sub> | -0.059 | C <sub>24</sub> | 0.201  | O <sub>10</sub> | -0.432 | H <sub>11</sub> | 0.484 |
| C <sub>12</sub> | -0.196 | C <sub>25</sub> | 0.155  | O <sub>11</sub> | -0.643 |                 |       |
| C <sub>13</sub> | 0.236  | C <sub>26</sub> | 0.085  | N               | -0.346 |                 |       |

**Table S8** DFT-calculated partial atomic charges of DOX using the RESP method.<sup>1</sup>

| Atom            | RESP   | Atom            | RESP   | Atom            | RESP   | Atom            | RESP  |
|-----------------|--------|-----------------|--------|-----------------|--------|-----------------|-------|
| C <sub>1</sub>  | -0.127 | C <sub>14</sub> | -0.035 | C <sub>27</sub> | 0.211  | H <sub>1</sub>  | 0.151 |
| C <sub>2</sub>  | -0.166 | C <sub>15</sub> | 0.162  | O <sub>1</sub>  | -0.356 | H <sub>2</sub>  | 0.160 |
| C <sub>3</sub>  | -0.076 | C <sub>16</sub> | 0.218  | O <sub>2</sub>  | -0.286 | H <sub>3</sub>  | 0.144 |
| C <sub>4</sub>  | -0.243 | C <sub>17</sub> | 0.043  | O <sub>3</sub>  | -0.514 | H <sub>4</sub>  | 0.423 |
| C <sub>5</sub>  | -0.039 | C <sub>18</sub> | 0.034  | O <sub>4</sub>  | -0.679 | H <sub>5</sub>  | 0.415 |
| C <sub>6</sub>  | 0.203  | C <sub>19</sub> | 0.430  | O <sub>5</sub>  | -0.715 | H <sub>6</sub>  | 0.398 |
| C <sub>7</sub>  | 0.569  | C <sub>20</sub> | 0.330  | O <sub>6</sub>  | -0.355 | H <sub>7</sub>  | 0.398 |
| C <sub>8</sub>  | 0.724  | C <sub>21</sub> | 0.195  | O <sub>7</sub>  | -0.463 | H <sub>8</sub>  | 0.138 |
| C <sub>9</sub>  | -0.246 | C <sub>22</sub> | 0.084  | O <sub>8</sub>  | -0.505 | H <sub>9</sub>  | 0.396 |
| C <sub>10</sub> | 0.246  | C <sub>23</sub> | 0.248  | O <sub>9</sub>  | -0.522 | H <sub>10</sub> | 0.386 |
| C <sub>11</sub> | -0.069 | C <sub>24</sub> | 0.179  | O <sub>10</sub> | -0.495 | H <sub>11</sub> | 0.419 |

|                 |        |                 |       |                 |        |  |  |
|-----------------|--------|-----------------|-------|-----------------|--------|--|--|
| C <sub>12</sub> | -0.192 | C <sub>25</sub> | 0.177 | O <sub>11</sub> | -0.580 |  |  |
| C <sub>13</sub> | 0.197  | C <sub>26</sub> | 0.006 | N               | -1.021 |  |  |

**Table S9** DFT-calculated partial atomic charges of DOX in the gas phase and different solvents.

| Atom            | Gas Phase | water  | DMSO   | DMF    | EtOH   |
|-----------------|-----------|--------|--------|--------|--------|
| O <sub>4</sub>  | -0.763    | -0.787 | -0.787 | -0.786 | -0.786 |
| O <sub>9</sub>  | -0.669    | -0.687 | -0.687 | -0.686 | -0.686 |
| O <sub>10</sub> | -0.689    | -0.711 | -0.711 | -0.711 | -0.710 |
| O <sub>11</sub> | -0.779    | -0.797 | -0.796 | -0.796 | -0.796 |
| N               | -0.937    | -0.947 | -0.947 | -0.947 | -0.947 |

**Table S10** MD-calculated first peak position of *RDFs* between DOX and solvent atoms.

| DOX/water             | <i>r</i> (Å) | DOX/EtOH                   | <i>r</i> (Å) | DOX/DMSO                   | <i>r</i> (Å) | DOX/DMF                   | <i>r</i> (Å) |
|-----------------------|--------------|----------------------------|--------------|----------------------------|--------------|---------------------------|--------------|
| H <sub>4</sub> ...OW  | 1.58         | H <sub>4</sub> ...O(EtOH)  | 1.48         | H <sub>4</sub> ...O(DMSO)  | 1.38         | H <sub>4</sub> ...O(DMF)  | 1.48         |
| H <sub>11</sub> ...OW | 1.64         | H <sub>11</sub> ...O(EtOH) | 1.56         | H <sub>11</sub> ...O(DMSO) | 1.44         | H <sub>11</sub> ...O(DMF) | 1.54         |
| H <sub>5</sub> ...OW  | 1.68         | H <sub>5</sub> ...O(EtOH)  | 1.56         | H <sub>9</sub> ...O(DMSO)  | 1.44         | H <sub>5</sub> ...O(DMF)  | 1.54         |
| H <sub>7</sub> ...OW  | 2.04         | H <sub>9</sub> ...O(EtOH)  | 1.56         | H <sub>10</sub> ...O(DMSO) | 1.44         | H <sub>10</sub> ...O(DMF) | 1.64         |
| H <sub>6</sub> ...OW  | 2.14         | H <sub>10</sub> ...O(EtOH) | 1.58         | H <sub>5</sub> ...O(DMSO)  | 1.44         | H <sub>8</sub> ...O(DMF)  | 1.90         |

**Table S11** Average of hydrogen bond lifetimes ( $\tau(HB)$ ) between DOX and solvent atoms.

| System       | Donor...Acceptor           | $\tau \times 10^{-3}$ (ps) |
|--------------|----------------------------|----------------------------|
| <b>Water</b> | OW...H <sub>5</sub>        | 0.938                      |
|              | OW...H <sub>11</sub>       | 0.975                      |
|              | OW...H <sub>4</sub>        | 0.976                      |
|              | OW...H <sub>5</sub>        | 0.975                      |
|              | O <sub>11</sub> ...HW      | 0.970                      |
|              | O <sub>4</sub> ...HW       | 0.974                      |
|              | O <sub>3</sub> ...HW       | 0.977                      |
| <b>DMSO</b>  | O(DMSO)...H <sub>11</sub>  | 5.495                      |
|              | O(DMSO)...H <sub>9</sub>   | 5.495                      |
|              | O(DMSO)...H <sub>4</sub>   | 5.495                      |
| <b>EtOH</b>  | O(EtOH)...H <sub>5</sub>   | 5.020                      |
|              | O(EtOH)...H <sub>11</sub>  | 5.379                      |
|              | O(EtOH)...H <sub>4</sub>   | 5.422                      |
|              | O <sub>5</sub> ...H(EtOH)  | 5.495                      |
|              | O <sub>9</sub> ...H(EtOH)  | 1.611                      |
|              | O <sub>11</sub> ...H(EtOH) | 5.495                      |
|              | O <sub>4</sub> ...H(EtOH)  | 3.673                      |
| <b>DMF</b>   | O(DMF)...H <sub>5</sub>    | 4.653                      |
|              | O(DMF)...H <sub>11</sub>   | 4.382                      |
|              | O(DMF)...H <sub>4</sub>    | 4.538                      |



**Table S12** Calculated first peaks of *RDFs* between different pairs of atoms in DPPC/DOX/water and octanol/DOX/water systems.

| DPPC/DOX/water                            |              |                       |              | octanol/DOX/water         |              |                       |              |
|-------------------------------------------|--------------|-----------------------|--------------|---------------------------|--------------|-----------------------|--------------|
| DOX/DPPC                                  | <i>r</i> (Å) | DOX/water             | <i>r</i> (Å) | DOX/octanol               | <i>r</i> (Å) | DOX/water             | <i>r</i> (Å) |
| H <sub>11</sub> ...O <sub>9</sub> (DPPC)  | 1.53         | O <sub>11</sub> ...HW | 1.84         | O <sub>4</sub> ...H(oct)  | 1.46         | O <sub>4</sub> ...HW  | 1.67         |
| H <sub>4</sub> ...O <sub>9</sub> (DPPC)   | 1.53         | O <sub>4</sub> ...HW  | 1.84         | O <sub>11</sub> ...H(oct) | 1.67         | O <sub>11</sub> ...HW | 1.67         |
| H <sub>8</sub> ...O <sub>9</sub> (DPPC)   | 1.84         | O <sub>3</sub> ...HW  | 1.84         | O <sub>6</sub> ...H(oct)  | 1.67         | O <sub>3</sub> ...HW  | 1.67         |
| H <sub>9</sub> ...O <sub>9</sub> (DPPC)   | 1.84         | O <sub>5</sub> ...HW  | 1.84         | O <sub>5</sub> ...H(oct)  | 1.67         | O <sub>5</sub> ...HW  | 1.67         |
| H <sub>6</sub> ...O <sub>9</sub> (DPPC)   | 2.46         | O <sub>1</sub> ...HW  | 1.84         | O <sub>1</sub> ...H(oct)  | 1.87         | O <sub>1</sub> ...HW  | 1.67         |
| H <sub>11</sub> ...O <sub>10</sub> (DPPC) | 1.53         | H <sub>4</sub> ...OW  | 1.53         | H <sub>4</sub> ...O(oct)  | 1.46         | H <sub>4</sub> ...OW  | 1.67         |
| H <sub>9</sub> ...O <sub>10</sub> (DPPC)  | 1.53         | H <sub>11</sub> ...OW | 1.53         | H <sub>11</sub> ...O(oct) | 1.67         | H <sub>11</sub> ...OW | 1.67         |
| H <sub>8</sub> ...O <sub>10</sub> (DPPC)  | 1.53         | H <sub>9</sub> ...OW  | 1.84         | -----                     | -----        | H <sub>5</sub> ...OW  | 1.67         |
| H <sub>6</sub> ...O <sub>10</sub> (DPPC)  | 1.84         | H <sub>7</sub> ...OW  | 2.15         | -----                     | -----        | H <sub>7</sub> ...OW  | 2.08         |
| H <sub>3</sub> ...O <sub>10</sub> (DPPC)  | 2.46         | H <sub>6</sub> ...OW  | 2.15         | -----                     | -----        | H <sub>9</sub> ...OW  | 2.50         |

## References

- 1 A. Jagusiak and T. Pańczyk, Interaction of Congo Red, Evans Blue and Titan Yellow with doxorubicin in aqueous solutions. A molecular dynamics study, *J. Mol. Liq.*, 2019, **279**, 640–648.
